# Supplementary material for: Sterol Composition Modulates the Response of Saccharomyces cerevisiae to Iron Deficiency
Source: MDPI journal article supplement (doi:10.3390/jof7110901), 2021-10-25
Supplement: s1 [file s1]

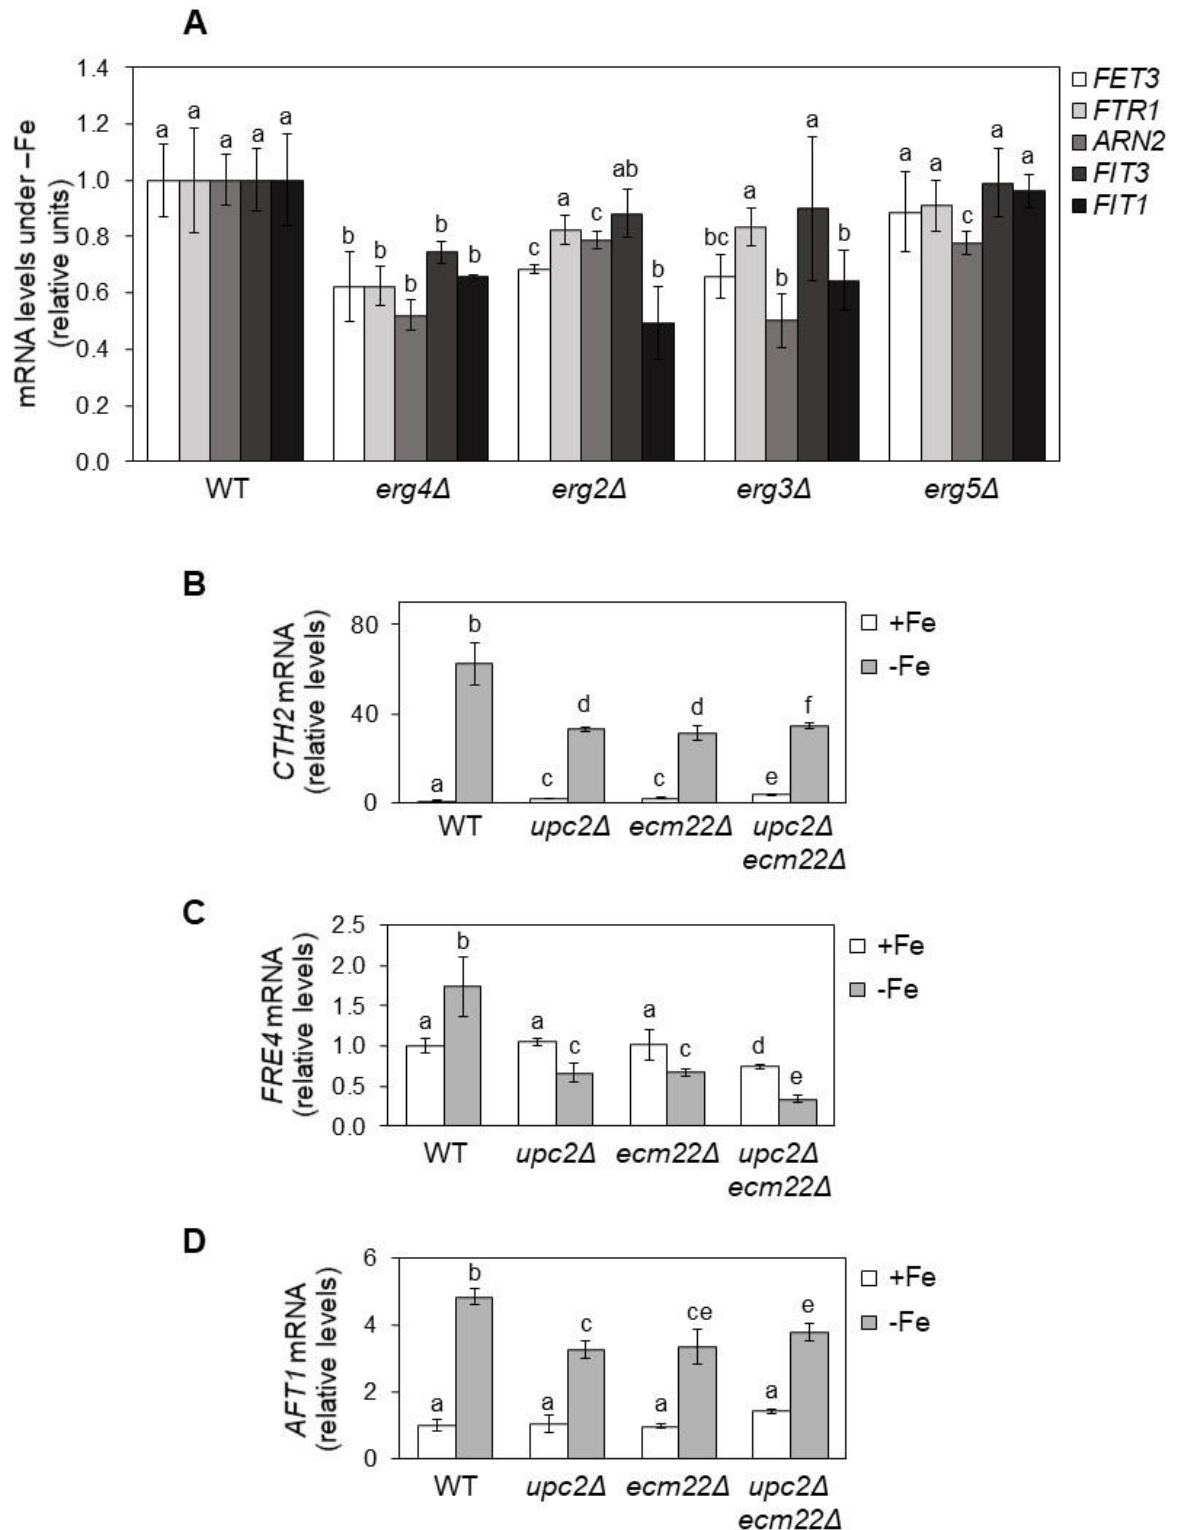

**Figure S1.** Mutants in genes related to ergosterol biosynthesis display defects in iron regulon activation upon iron deficiency. (A) Wild-type (WT, BY4741), *erg4Δ*, *erg2Δ*, *erg3Δ* and *erg5Δ* were cultivated as described in Figure 2A. The mRNA levels of *FET3*, *FTR1*, *ARN2*, *FIT3* and *FIT1*, normalized to *PGK1* mRNA, were determined by RT-qPCR and represented in relation to wild-type strain in -Fe. (B-D) The mRNA levels of *CTH2*, *FRE4* and *AFT1*, normalized to *ACT1* mRNA, were determined in wild-type (WT, W303), *upc2Δ*, *ecm22Δ* and *upc2Δecm22Δ* cells of Figure 2B-D and represented in relation to wild-type strain in +Fe. In all cases, data show average and SD of 3 biologically independent experiments. Different letters indicate statistically significant differences between each strain for a specific mRNA (p value < 0.05).

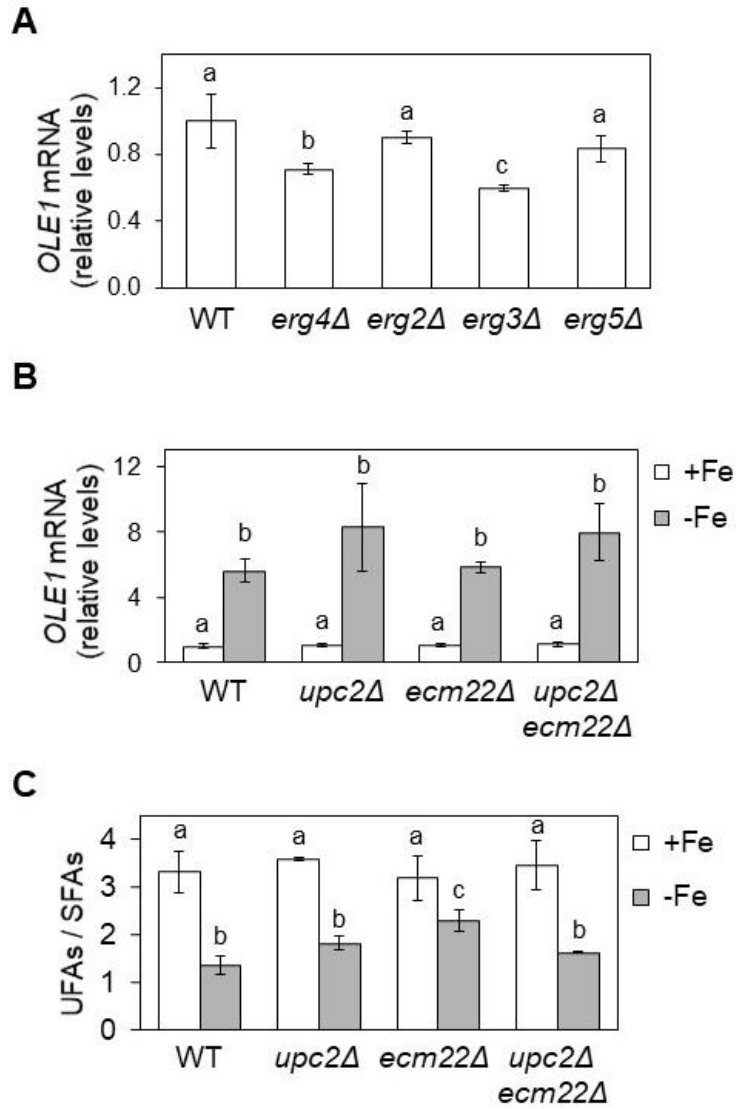

**Figure S2.** The limitation of iron regulon activation in cells with defects in ergosterol biosynthesis is not due to a decrease in UFA synthesis. (A) Levels of *OLE1* mRNA, normalized with *PGK1*, in wild-type (WT, BY4741), *erg4Δ*, *erg2Δ*, *erg3Δ* and *erg5Δ* cells of Figures 1 and 3A. (B) Levels of *OLE1* mRNA, normalized with *ACT1*, in wild-type (WT, W303), *upc2Δ*, *ecm22Δ* and *upc2Δecm22Δ* cells of Figure 2B-D. In both cases, data represent the average and SD of 3 biologically independent experiments, relative to WT cells in -Fe (A) or +Fe conditions (B). (C) Wild-type (WT, W303), *upc2Δ*, *ecm22Δ* and *upc2Δecm22Δ* cells were cultivated as described in Figure 4. UFA and SFA percentages were determined as described in Material and Methods, and the average and standard deviation in UFA/SFA ratio of four biologically independent experiments was represented. Different letters represent significant differences (p value < 0.05).

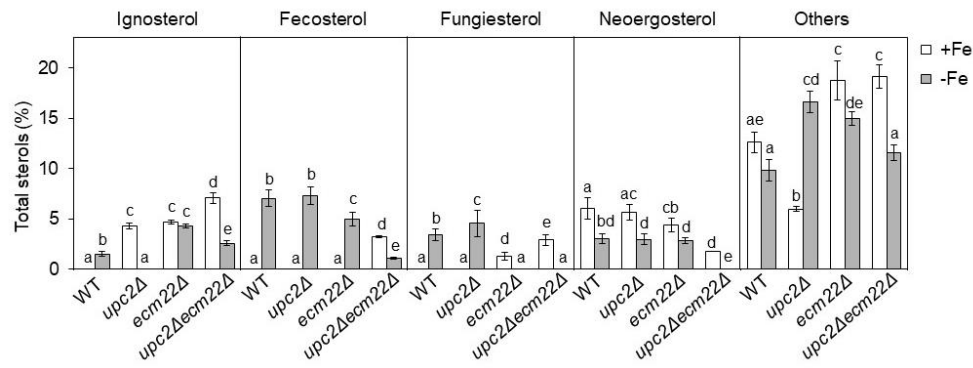

**Figure S3.** Iron deficiency modifies the sterols profile of Upc2/Ecm22 mutants. Relative levels of sterol intermediates, including ignosterol, fecosterol, fungiesterol, neoergosterol and others, were determined in cells from Figure 4. Data were analyzed and represented as in Figure 5.

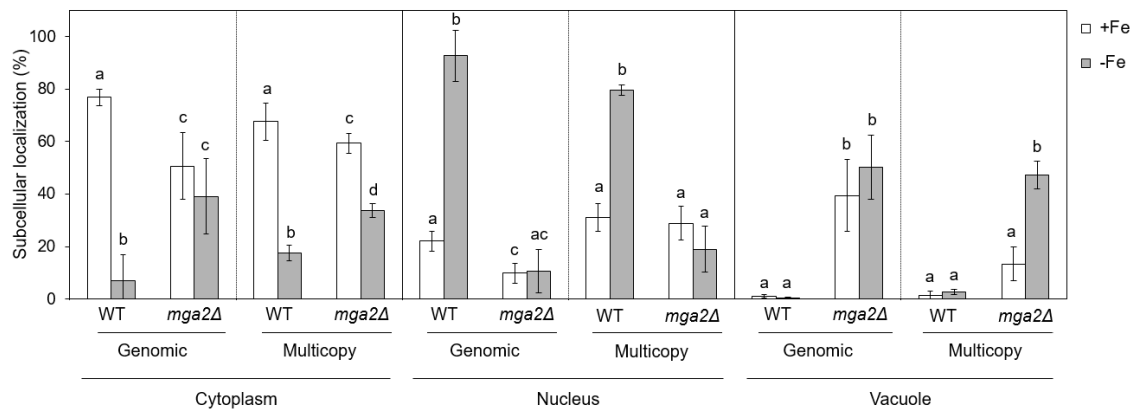

**Figure S4.** The localization of Aft1 protein is altered in *mga2Δ* mutants grown in iron-sufficient conditions. Wild-type (WT, BY4741) and *mga2Δ* (SPY824) cells expressing a genomic Aft1-GFP or a plasmid-expressed GFP-Aft1 (JK1346, pRS426-GFP-AFT1) were cultivated at 30 °C for 6 hours to exponential phase in SC or in SC-Ura, respectively, without (+Fe) or with 100 μM BPS (-Fe). Quantitative analysis of Aft1 protein localization patterns were performed as described in Figure 7. Different letters represent significant differences within the same box (p value < 0.05).

**Table S1.** Description and source of yeast strains and plasmids used in this work.

| Strain/Plasmid                    | Description                                                    | Source     |
|-----------------------------------|----------------------------------------------------------------|------------|
| <i>Strains</i>                    |                                                                |            |
| BY4741                            | <i>MATa his3Δ1 leu2Δ0 met15Δ0 ura3Δ0</i>                       | Invitrogen |
| SPY1161                           | BY4741 <i>erg2::KanMX4</i>                                     | Invitrogen |
| SPY1162                           | BY4741 <i>erg3::KanMX4</i>                                     | Invitrogen |
| SPY1163                           | BY4741 <i>erg4::KanMX4</i>                                     | Invitrogen |
| SPY1164                           | BY4741 <i>erg5::KanMX4</i>                                     | Invitrogen |
| W303-1a                           | <i>MATa ade2-1 leu2-3,112 his3-1 ura3-52 trp1-100 can1-100</i> | [1]        |
| JRY7179                           | W303-1a <i>upc2::HIS3</i>                                      | [1]        |
| JRY7180                           | W303-1a <i>ecm22::TRP1</i>                                     | [1]        |
| JRY7181                           | W303-1a <i>ecm22::TRP1 upc2::HIS3</i>                          | [1]        |
| SPY824                            | BY4741 <i>mga2::KanMX4</i>                                     | Invitrogen |
| SPY1212                           | BY4741 <i>AFT1-GFP::His3MX6</i>                                | This study |
| SPY1213                           | BY4741 <i>mga2::KanMX4 AFT1-GFP::His3MX6</i>                   | This study |
| <i>Plasmids</i>                   |                                                                |            |
| P <sub>FET3</sub> -lacZ           | CEN <i>URA3 P<sub>FET3</sub>-lacZ</i>                          | J. Kaplan  |
| pSP441                            | CEN <i>URA3 P<sub>CYC1-FeRE</sub>-lacZ</i>                     | [2]        |
| JK1346                            | 2 μm <i>URA3 GFP-AFT1</i>                                      | J. Kaplan  |
| pRS416                            | CEN <i>URA3</i>                                                | M. Funk    |
| pRS416-AFT1-1 <sup>up</sup> -12HA | CEN <i>URA3 AFT1-1<sup>up</sup>(C291F)-12HA</i>                | [3]        |
| pNEV-N                            | 2 μm <i>URA3</i>                                               | [4]        |
| pNEV-DAN1                         | pNEV-N <i>P<sub>PMAT</sub>-AUS1</i>                            | [4]        |

|                         |                                           |     |
|-------------------------|-------------------------------------------|-----|
| YEp13                   | 2 $\mu$ m <i>LEU2</i>                     | [4] |
| YEp13-AUS1              | YEp13 <i>P<sub>PMAl</sub>-AUS1</i>        | [4] |
| pFA6a-GFP(S65T)-His3MX6 | <i>GFP(S65T)-T<sub>ADHI</sub>-His3MX6</i> | [5] |

[1] Vik, A., & Rine, J. (2001). Upc2p and Ecm22p, dual regulators of sterol biosynthesis in *Saccharomyces cerevisiae*. *Mol Cell Biol*, 21(19), 6395-6405. doi:10.1128/MCB.21.19.6395-6405.2001

[2] Puig, S., Askeland, E., & Thiele, D. J. (2005). Coordinated remodeling of cellular metabolism during iron deficiency through targeted mRNA degradation. *Cell*, 120(1), 99-110. doi:10.1016/j.cell.2004.11.032

[3] Ueta, R., Fujiwara, N., Iwai, K., & Yamaguchi-Iwai, Y. (2012). Iron-induced dissociation of the Aft1p transcriptional regulator from target gene promoters is an initial event in iron-dependent gene suppression. *Mol Cell Biol*, 32(24), 4998-5008. doi:10.1128/MCB.00726-12

[4] Alimardani, P., Regnacq, M., Moreau-Vauzelle, C., Ferreira, T., Rossignol, T., Blondin, B., & Berges, T. (2004). SUT1-promoted sterol uptake involves the ABC transporter Aus1 and the mannoprotein Dan1 whose synergistic action is sufficient for this process. *Biochem J*, 381(Pt 1), 195-202. doi:10.1042/BJ20040297

[5] Longtine, M. S., McKenzie, A., 3rd, Demarini, D. J., Shah, N. G., Wach, A., Brachat, A., Philippsen, P., & Pringle, J. R. (1998). Additional modules for versatile and economical PCR-based gene deletion and modification in *Saccharomyces cerevisiae*. *Yeast*, 14(10), 953-961. doi:10.1002/(SICI)1097-0061(199807)14:10<953::AID-YEA293>3.0.CO;2-U

**Table S2.** Oligonucleotides used for RT-qPCR in this work.

| <i>Name</i>  | <i>Sequence (from 5' to 3')</i>                                      |
|--------------|----------------------------------------------------------------------|
| FET3-qPCR-F  | TGACCGTTTTGTCTTCAGGT                                                 |
| FET3-qPCR-R  | CTCCACGATTTTCATCCTTCTC                                               |
| FTR1-qPCR-F  | GGTCACTTGCCTTTCACCAA                                                 |
| FTR1-qPCR-R  | TTGCTCTTCCGTCAACTCCT                                                 |
| ARN2-qPCR-F  | TTCCTTTCGCTCCATTCAAG                                                 |
| ARN2-qPCR-R  | GAGATACCCAGCAGCCATTT                                                 |
| FIT3-qPCR-F  | CATCCTCTAGCACCGCTGAA                                                 |
| FIT3-qPCR-R  | CAATAACATGACGGCAGCAA                                                 |
| FIT1-qPCR-F  | TCTAGGGATGCCCAATCTGT                                                 |
| FIT1-qPCR-R  | ACCAGCGGTAGTGGTTTGA                                                  |
| OLE1-qPCR-F  | TCGACAAGAAGGGAAACGAA                                                 |
| OLE1-qPCR-R  | CATGGTTGTTCCGAGATGTG                                                 |
| ACT1-qPCR-F  | TCGTTCCAATTTACGCTGGTT                                                |
| ACT1-qPCR-R  | CGGCCAAATCGATTCTCAA                                                  |
| PGK1-qPCR-F  | AAGCGTGTCTTCATCAGAGTTG                                               |
| PGK1-qPCR-R  | CGTATCTTGGGTGGTGTTC                                                  |
| AFT1-F2      | AATGGTGAACGGCGAGTTGAAGTAT<br>GTGAAGCCAGAAGATCGGATCCCC<br>GGGTTAATTAA |
| AFT1-R1      | ATGAAAATGGACGAGAGATACGTC<br>TAAGTTTGATTTTCATCGAATTGAG<br>CTCGTTTAAAC |
| TermTEF:135F | CGACATCATCTGCCCAGAT                                                  |
| Aft1+275-R   | CAGCCTAATCTACCGGCAAAA                                                |
